# Supplementary material for: Fungal Pathogens Associated with Aerial Symptoms of Avocado (Persea americana Mill.) in Tenerife (Canary Islands, Spain) Focused on Species of the Family Botryosphaeriaceae
Source: MDPI journal article supplement (doi:10.3390/microorganisms11030585), 2023-02-25
Supplement: s1 [file Table S1.pdf › Table S1.pdf]

**Table S1.** GenBank and culture collection accession numbers of *Neofusicoccum* species treated in the phylogenies

| Species name                   | Isolated/Culture collection number <sup>1</sup> | Host                         | Country      | Collector(s)          | GenBank accession numbers |             |             |
|--------------------------------|-------------------------------------------------|------------------------------|--------------|-----------------------|---------------------------|-------------|-------------|
|                                |                                                 |                              |              |                       | ITS1-2                    | <i>tef1</i> | <i>tub2</i> |
| <i>Botryosphaeria dothidea</i> | CBS 115476                                      | <i>Prunus</i> sp.            | Switzerland  | B. Slippers           | AY236949                  | AY236898    | AY236927    |
| <i>N. australe</i>             | CBS 121115                                      | <i>Prunus persica</i>        | South Africa | U. Damm               | EF445355                  | EF445386    | KX464948    |
|                                | CBS 122025                                      | <i>Eucalyptus</i> sp.        | Spain        | R. Alzugaray          | KX464160                  | KX464672    | KX464949    |
|                                | CBS 122026                                      | <i>Eucalyptus</i> sp.        | Spain        | R. Alzugaray          | KX464161                  | KX464673    | KX464950    |
|                                | <b>CMW 6837</b>                                 | <i>Acacia</i> sp.            | Australia    | M.J. Wingfield        | AY339262                  | AY339270    | AY339254    |
| <i>N. cryptoaustrale</i>       | <b>CBS 122813</b>                               | <i>Eucalyptus</i> sp.        | South Africa | H.M. Maleme           | FJ752742                  | FJ752713    | FJ752756    |
| <i>N. luteum</i>               | <b>CBS 562.92</b>                               | <i>Actinidia deliciosa</i>   | New Zealand  | S.R. Pennycook        | KX464170                  | KX464690    | KX464968    |
|                                | CBS 110299                                      | <i>Vitis vinifera</i>        | Portugal     | A.J.L. Phillips       | AY259091                  | KX464688    | DQ458848    |
|                                | CBS 118842                                      | <i>Syzygium cordatum</i>     | South Africa | D. Pavlic             | DQ316088                  | MT592196    | MT592688    |
|                                | CBS 133502                                      | <i>Persea americana</i>      | USA          | A. Eskalen            | MT587483                  | MT592197    | MT592689    |
| <i>N. mediterraneum</i>        | CBS 140738                                      | <i>Avicennia marina</i>      | South Africa | J.A. Osorio & J. Roux | NR_147360                 | MT592206    | MT592698    |
|                                | CBS 140740                                      | <i>Bruguiera gymnorrhiza</i> | South Africa | J.A. Osorio           | MT587493                  | MT592208    | MT592700    |
|                                | <b>CBS 113083</b>                               | <i>Pistacia vera</i>         | USA          | T.J. Michailides      | KX464186                  | KX464712    | KX464998    |
|                                | CBS 113084                                      | <i>Sequoia sempervirens</i>  | USA          | T.J. Michailides      | KX464187                  | KX464713    | KX464999    |
|                                | <b>CBS 113089</b>                               | <i>Pistacia vera</i>         | USA          | T.J. Michailides      | KX464199                  | KX464727    | KX465014    |
|                                | CBS 121558                                      | <i>Olea europea</i>          | Italy        | F. Salvatore          | GU799463                  | GU799462    | GU799461    |
|                                | CBS 123650                                      | <i>Syzygium cordatum</i>     | South Africa | D. Pavlic             | KX464182                  | KX464708    | KX464994    |
| <i>N. parvum</i>               | CBS 123651                                      | <i>Syzygium cordatum</i>     | South Africa | D. Pavlic             | KX464183                  | KX464709    | KX464995    |
|                                | CBS 123652                                      | <i>Syzygium cordatum</i>     | South Africa | D. Pavlic             | KX464184                  | KX464710    | KX464996    |
|                                | CBS 133503                                      | <i>Persea americana</i>      | USA          | A. Eskalen            | MT587504                  | MT592219    | MT592711    |
|                                | CBS 145622                                      | <i>Ficus carica</i>          | Italy        | D. Aiello             | MN611179                  | MN623346    | MN623343    |
|                                | CBS 145623                                      | <i>Ficus carica</i>          | Italy        | D. Aiello             | MN611180                  | MN623347    | MN623344    |
|                                | CBS 145624                                      | <i>Ficus carica</i>          | Italy        | D. Aiello             | MN611181                  | MN623348    | MN623345    |
|                                | CBS 145997                                      | <i>Aloe</i> sp.              | South Africa | P.W. Crous            | MT587449                  | MT592159    | MT592649    |

**Table S1.** GenBank and culture collection accession numbers of *Neofusicoccum* species treated in the phylogenies

| Species name               | Isolated/Culture collection number <sup>1</sup> | Host                         | Country      | Collector(s)   | GenBank accession numbers |             |             |
|----------------------------|-------------------------------------------------|------------------------------|--------------|----------------|---------------------------|-------------|-------------|
|                            |                                                 |                              |              |                | ITS1-2                    | <i>tef1</i> | <i>tub2</i> |
| <i>N. rapaneae</i>         | <b>CMW 9081</b>                                 | <i>Populus nigra</i>         | New Zealand  | G.J. Samuels   | AY236943                  | AY236888    | AY236917    |
|                            | <b>CBS 145973</b>                               | <i>Rapanea melanophloeos</i> | South Africa | M.J. Wingfield | MT587511                  | MT592226    | MT592718    |
|                            | CPC 32578                                       | <i>Rapanea</i> sp.           | South Africa | M.J. Wingfield | MT587512                  | MT592227    | MT592719    |
|                            | CPC 35288                                       | <i>Rapanea</i> sp.           | South Africa | M.J. Wingfield | MT587513                  | MT592228    | MT592720    |
| <i>N. stellenboschiana</i> | CBS 110866                                      | <i>Vitis vinifera</i>        | South Africa | F. Halleen     | MT587518                  | MT592242    | MT592734    |
|                            | CBS 118839                                      | <i>Syzygium cordatum</i>     | South Africa | D. Pavlic      | DQ316085                  | MT592243    | MT592735    |

<sup>1</sup> Bold culture collection numbers means ex-type strains
