# Supplementary material for: Fungal Pathogens Associated with Aerial Symptoms of Avocado (Persea americana Mill.) in Tenerife (Canary Islands, Spain) Focused on Species of the Family Botryosphaeriaceae
Source: MDPI journal article supplement (doi:10.3390/microorganisms11030585), 2023-02-25
Supplement: s1 [file Table S2.pdf › Table S2.pdf]

**Table S2.** GenBank and culture collection accession numbers of *Lasiodiplodia* species treated in the phylogenies.

| Species name                   | Isolated/Culture collection number <sup>1</sup> | Host                              | Country          | Collector(s)                  | GenBank accession numbers |             |             |
|--------------------------------|-------------------------------------------------|-----------------------------------|------------------|-------------------------------|---------------------------|-------------|-------------|
|                                |                                                 |                                   |                  |                               | ITS1-2                    | <i>tef1</i> | <i>tub2</i> |
| <i>L. brasiliensis</i>         | CBS 115447                                      | <i>Psychotria tutcheri</i>        | Hong Kong, China | -                             | MT587422                  | MT592134    | MT592614    |
|                                | CBS 120395                                      | <i>Theobroma cacao</i>            | Cameroon         | M. Mbenoun & N. Amoudou       | MT587423                  | MT592135    | MT592615    |
|                                | CMW 35884                                       | <i>Adansonia madagascariensis</i> | Madagascar       | -                             | KU887094                  | KU886972    | KU887466    |
| <i>L. laeliocattleyae</i>      | <b>CBS 130992</b>                               | <i>Mangifera indica</i>           | Egypt            | A. Ismail                     | JN814397                  | JN814424    | KU887508    |
|                                | <b>CBS 167.28</b>                               | <i>Laelio cattleya</i>            | Italy            | C. Sibilis                    | MT587425                  | MT592136    | MT592618    |
| <i>L. mediterranea</i>         | <b>CBS 137783</b>                               | <i>Quercus ilex</i>               | Italy            | B.T. Linaldeddu               | KJ638312                  | KJ638331    | KU887521    |
|                                | CBS 137784                                      | <i>Vitis vinifera</i>             | Italy            | S. Serra                      | KJ638311                  | KJ638330    | KU887522    |
| <i>L. pseudotheobromae</i>     | CBS 116459                                      | <i>Gmelina arborea</i>            | Costa Rica       | J. Carranza-Velásquez         | EF622077                  | EF622057    | EU673111    |
|                                | CBS 116460                                      | <i>Acacia mangium</i>             | Costa Rica       | -                             | EF622078                  | EF622058    | KU198428    |
|                                | CBS 121772                                      | <i>Acacia mellifera</i>           | Namibia          | F.J.J. van der Walt & J. Roux | EU101310                  | EU101355    | MT592627    |
|                                | CBS 121773                                      | <i>Acacia mellifera</i>           | Namibia          | F.J.J. van der Walt & J. Roux | EU101311                  | EU101356    | MT592628    |
|                                | CBS 130991                                      | <i>Mangifera indica</i>           | Egypt            | A. Ismail                     | MT587433                  | MT592145    | MT592629    |
| <i>L. theobromae</i>           | CBS 304.79                                      | <i>Rosa cv. Ilona</i>             | Netherlands      | P.D. Wageningen               | EF622079                  | EF622061    | MT592630    |
|                                | CGMCC 3.18047                                   | <i>Pteridium</i> sp.              | China            | W. He & Z. Dou                | KX499876                  | KX499914    | KX499989    |
|                                | CBS 111530                                      | <i>Leucospermum</i> sp.           | USA              | J.E. Taylor                   | EF622074                  | EF622054    | KU887531    |
|                                | CBS 130989                                      | <i>Mangifera indica</i>           | Egypt            | A.M. Ismail                   | MT587437                  | MT592149    | MT592634    |
|                                | CBS 138868                                      | <i>Ficus religiosa</i>            | Iran             | M. Mirabolfaty                | MT587438                  | MT592150    | MT592635    |
|                                | CBS 139728                                      | Human, knee                       | Netherlands      | N. Desbois                    | MT587439                  | MT592151    | MT592636    |
|                                | <b>CBS 164.96</b>                               | Fruit along coral reef coas       | Papua            | A. Aptroot                    | AY640255                  | AY640258    | KU887532    |
|                                | CBS 214.50                                      | <i>Cajanus cajan</i>              | India            | -                             | MT587440                  | MT592152    | MT592637    |
|                                | CBS 306.58                                      | <i>Cocos nucifera</i>             | -                | -                             | EF622071                  | EF622051    | MT592638    |
|                                | <b>CGMCC 3.18464</b>                            | <i>Aquilaria crassna</i>          | Laos             | X. Sun                        | KY783471                  | KY848609    | KY848552    |
| <i>L. viticola</i>             | <b>CBS 128313</b>                               | <i>Vitis vinifera</i>             | USA              | R.D.Cartwright & W.D. Gubler  | HQ288227                  | HQ288269    | HQ288306    |
|                                | CBS 128314                                      | <i>Vitis vinifera</i>             | USA              | K. Striegler & W.D. Gubler    | HQ288228                  | HQ288270    | HQ288307    |
| <i>Neodeightonia phoenicum</i> | CBS 122528                                      | <i>Phoenix</i> sp.                | Spain            | F. Garcia                     | EU673340                  | EU673309    | EU673116    |

<sup>1</sup> Bold culture collection numbers means ex-type strains
